# Supplementary material for: Colored Polymer-reinforced Metal-organic Framework Microparticles with High Charge-to-mass Ratio for Electrophoretic Display
Source: Research Square preprint supplement (doi:10.21203/rs.3.rs-6249755/v1), 2025-04-17
Supplement: Supplementary file 1 [file 41990c01c9ee72c4c2ef1ba2.docx]

*Supporting Information*

Colored Polymer-reinforced Metal-organic Framework Microparticles with High Charge-to-mass Ratio for Electrophoretic Display

*Jiamin Cheng1, 2, Mian Qin1, 2, Wenhao Wang1, 2, Jingxing Zhang1, 2, 3, Yao Wang1, 2, Hao Li1, 2, *, and Guofu Zhou1, 2, **

1Guangdong Provincial Key Laboratory of Optical Information Materials and Technology & Institute of Electronic Paper Displays, South China Academy of Advanced Optoelectronics, South China Normal University, Guangzhou 510006, China

2National Center for International Research on Green Optoelectronics, South China Normal University, Guangzhou 510006, China

3Faculty of Materials Science and Engineering/Institute of Technology for Carbon Neutrality, Shenzhen Institute of Advanced Technology, Chinese Academy of Sciences, Shenzhen, Guangdong, 518055, China

*Corresponding should be addressed to:

Associate Professor Hao Li; Tel: +86-20-39314813; Fax: +86-20-39314813

E-mail: haoli@m.scnu.edu.cn

Professor Guofu Zhou; Tel: +86-20-39314813; Fax: +86-20-39314813

E-mail: guofu.zhou@m.scnu.edu.cn


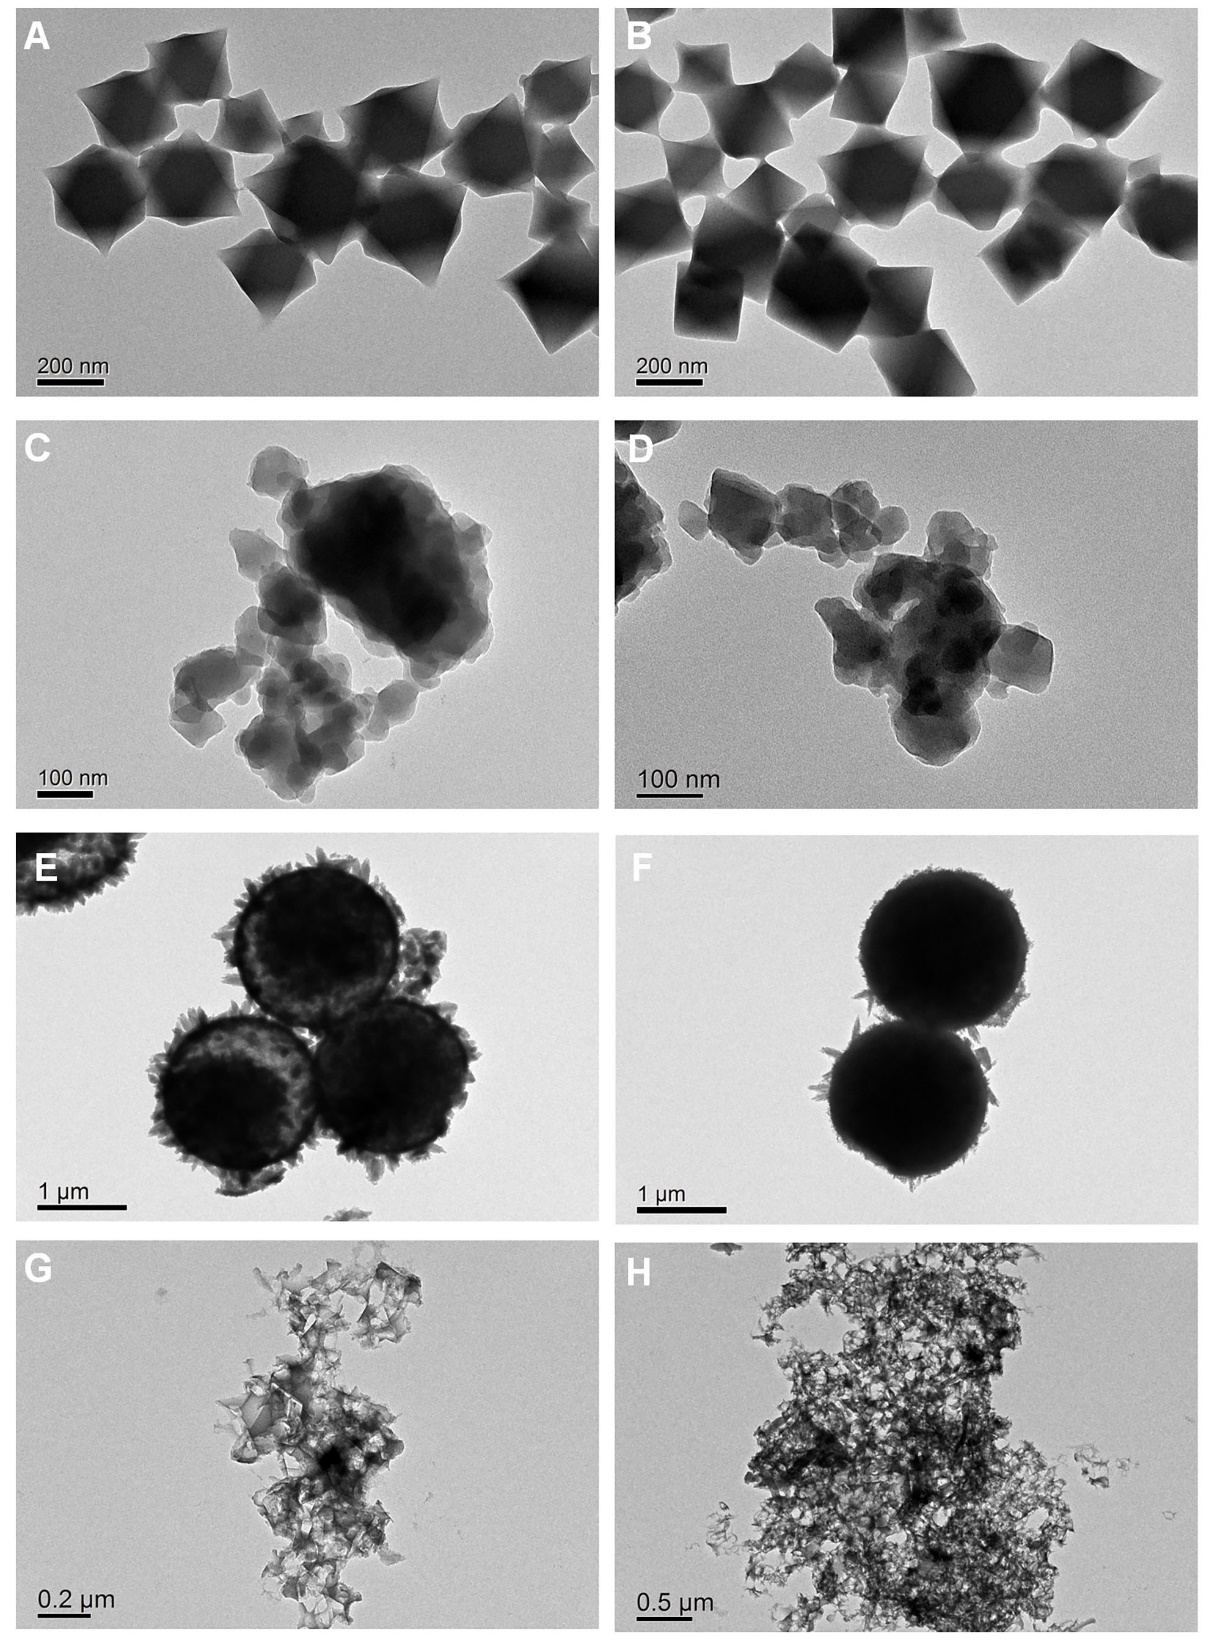


Figure S1. TEM images of the resulting Cu-BTC (A) & Cu-BTC-PEI (B), Fe-BTC (C) & Fe-BTC-PEI (D), Ni-BTC (E) & Ni-BTC-PEI (F), and Co-BTC (G) & Co-BTC-PEI microparticles (H).


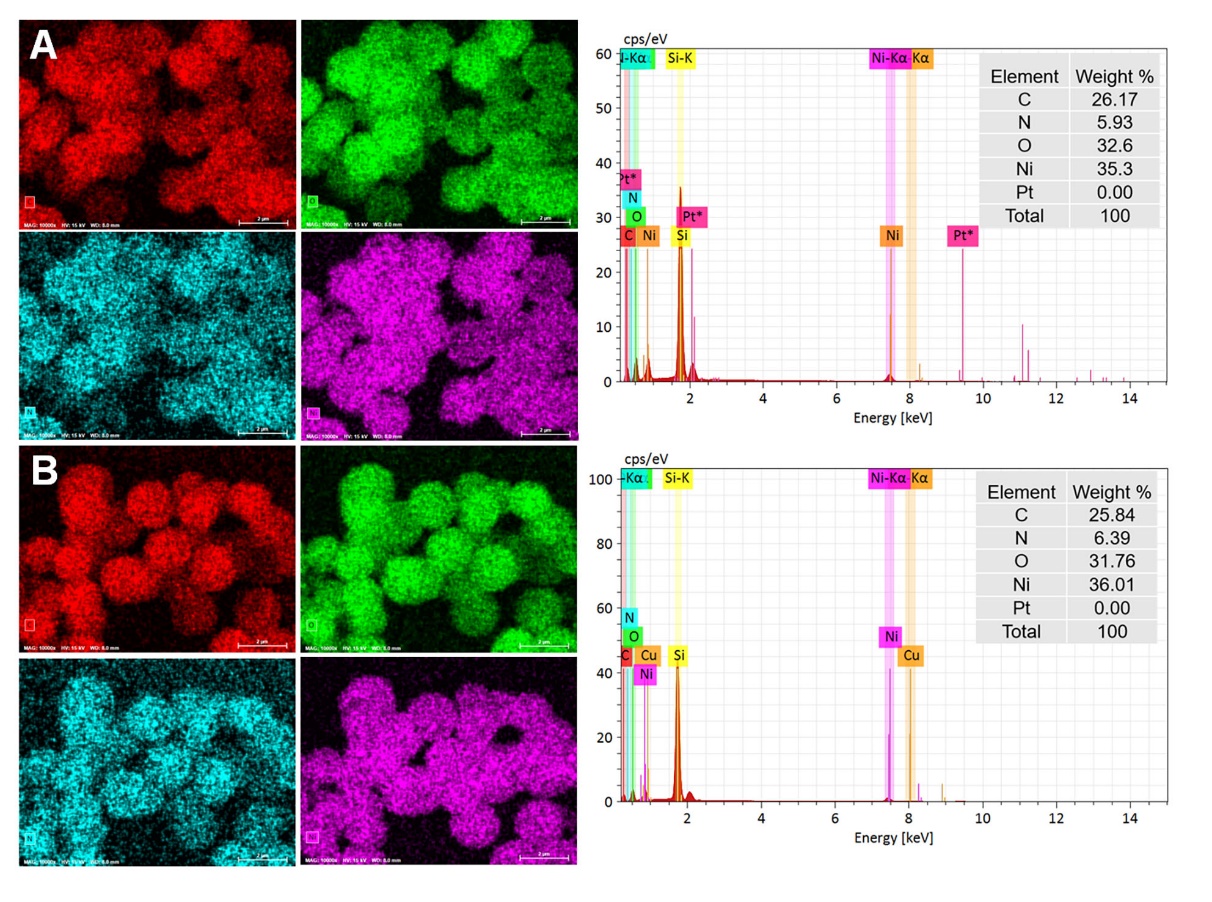


Figure S2. EDS elemental maps of the crude Ni-BTC (A) and the reinforced Ni-BTC-PEI microparticles (B).


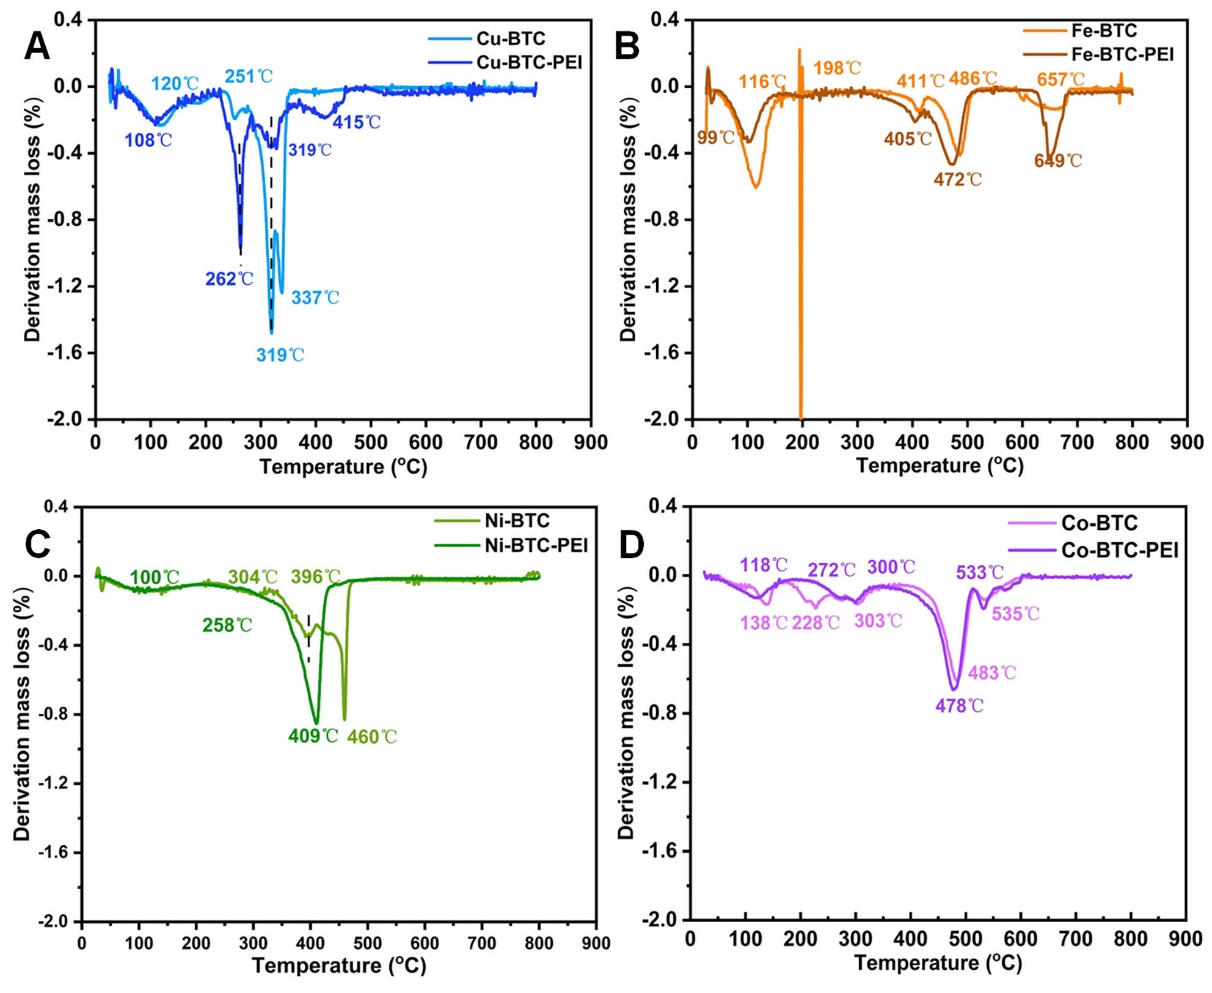


Figure S3. DTG curves for the resulting Cu-BTC & Cu-BTC-PEI (A), Fe-BTC & Fe-BTC-PEI (B), Ni-BTC & Ni-BTC-PEI (C), and Co-BTC & Co-BTC-PEI microparticles (D).


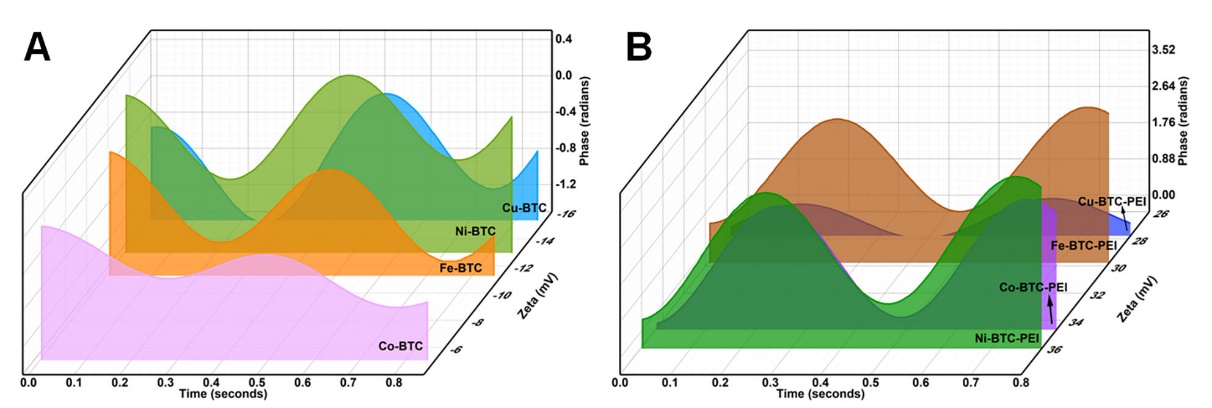


Figure S4. Zeta potential phase diagrams of the resulting M-BTC (A) and M-BTC-PEI microparticles (B)


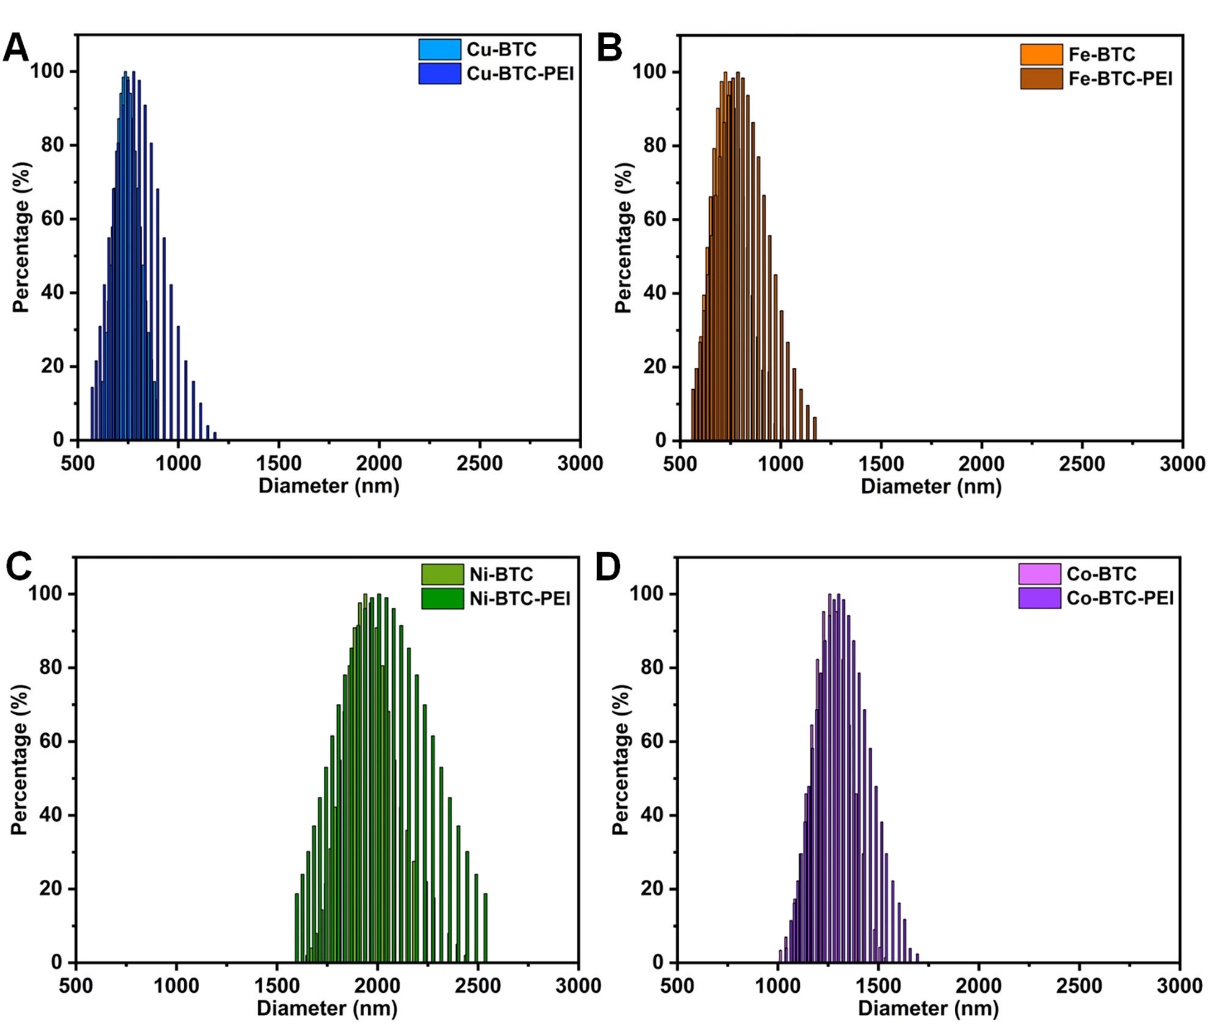


Figure S5. Particle size distributions of the resulting Cu-BTC & Cu-BTC-PEI (A), Fe-BTC & Fe-BTC-PEI (B), Ni-BTC & Ni-BTC-PEI (C), and Co-BTC & Co-BTC-PEI microparticles (D).


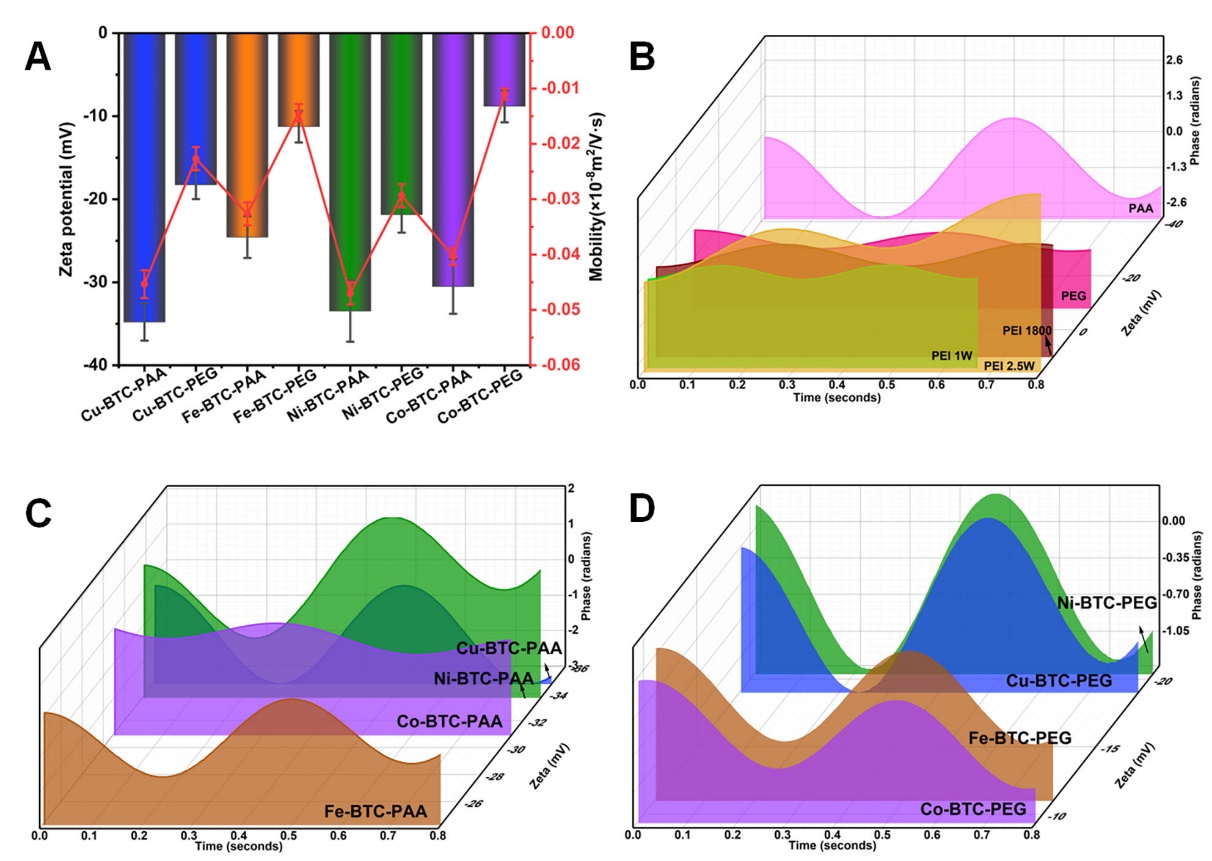


Figure S6. Zeta potentials and electrophoretic mobilities of the resulting M-BTC-PEG & M-BTC-PAA microparticles (A), and Zeta potential phase diagrams of the used polymers for reinforcing MOF microparticles (B), the resulting M-BTC-PAA (C) and M-BTC-PEG microparticles (D).


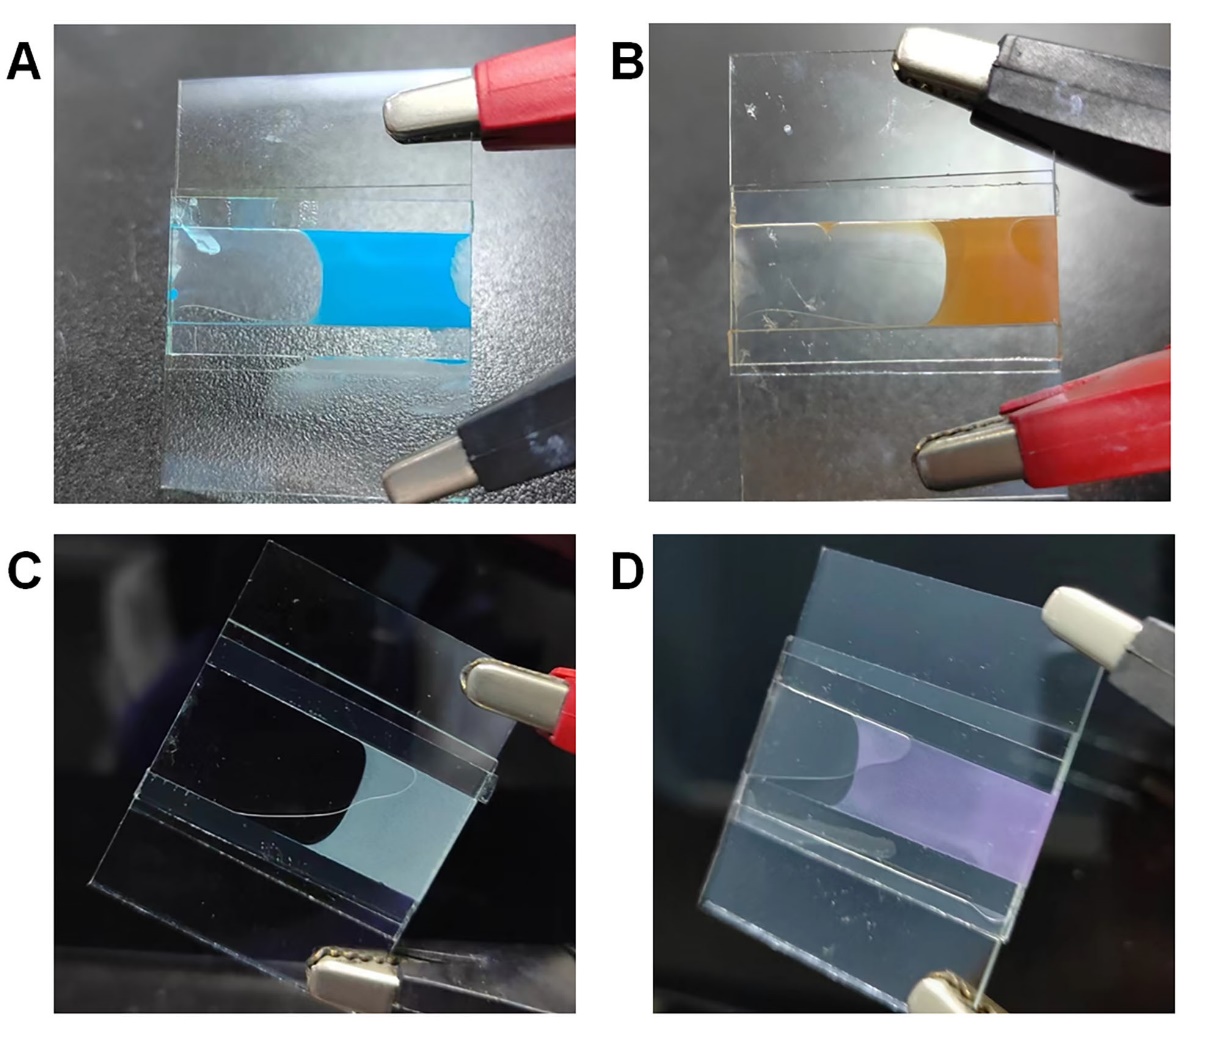


Figure S7. Single particle electrophoresis images of the resulting Cu-BTC-PEI (A), Fe-BTC-PEI (B), Ni-BTC-PEI (C), and Co-BTC-PEI microparticles (D) in the PIBSA-contained isododecane solution inside the predetermined electrophoresis tank with the settled spacing of 100 μm at a driving DC voltage of ±20 V.


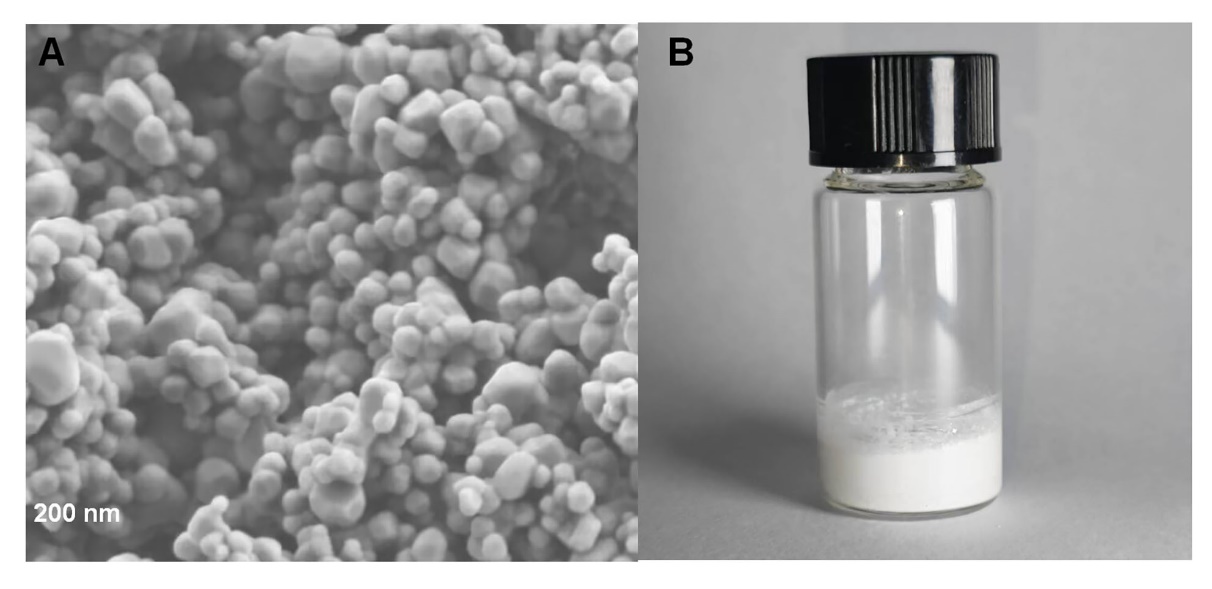


Figure S8. SEM (A) and real object image (B) of the modified white TiO2 nanoparticles


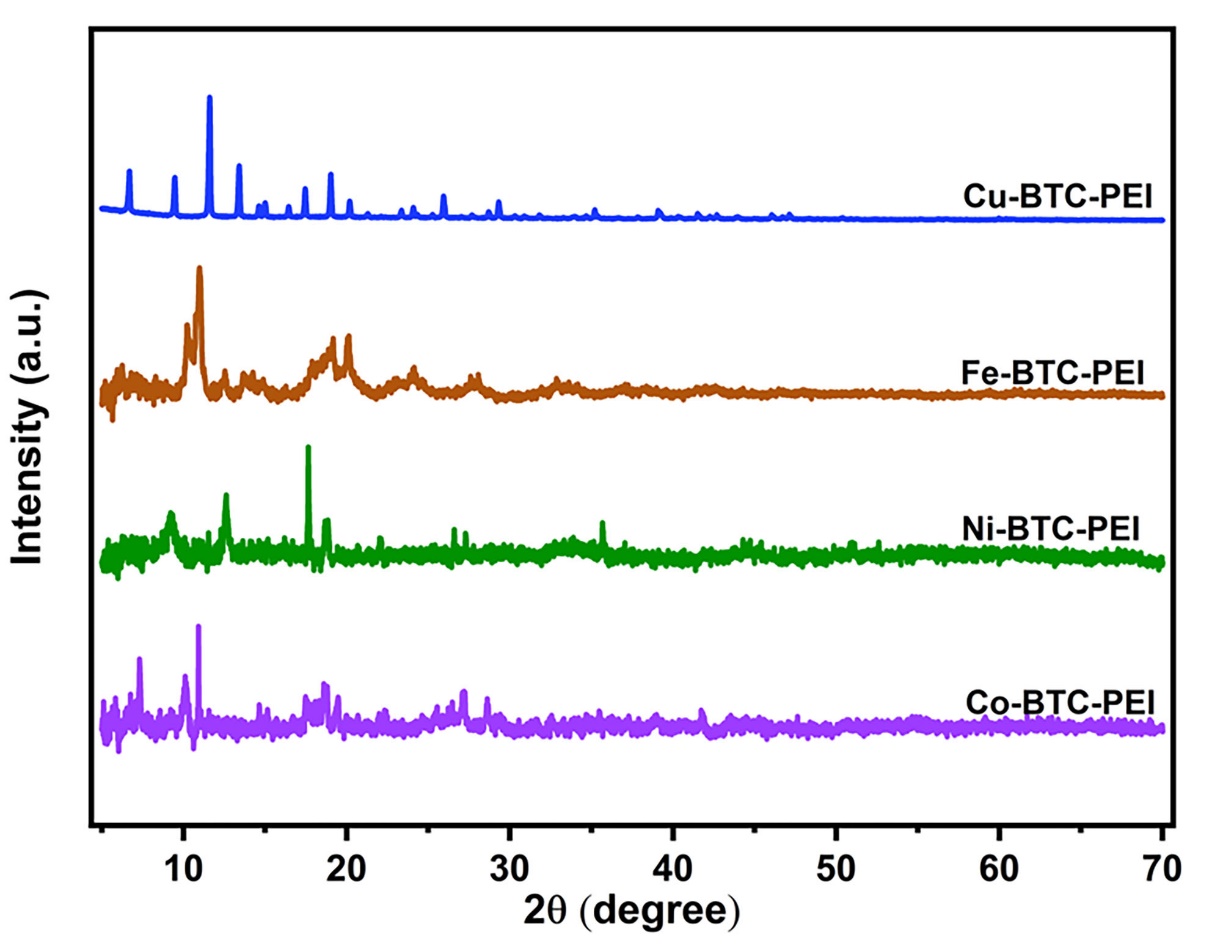


Figure S9. XRD patterns of the PEI-reinforced MOF microparticles inside the predetermined electrophoresis tank with the settled spacing of 100 μm at a driving DC voltage of ±20 V after continuous power (Time>1 hour).


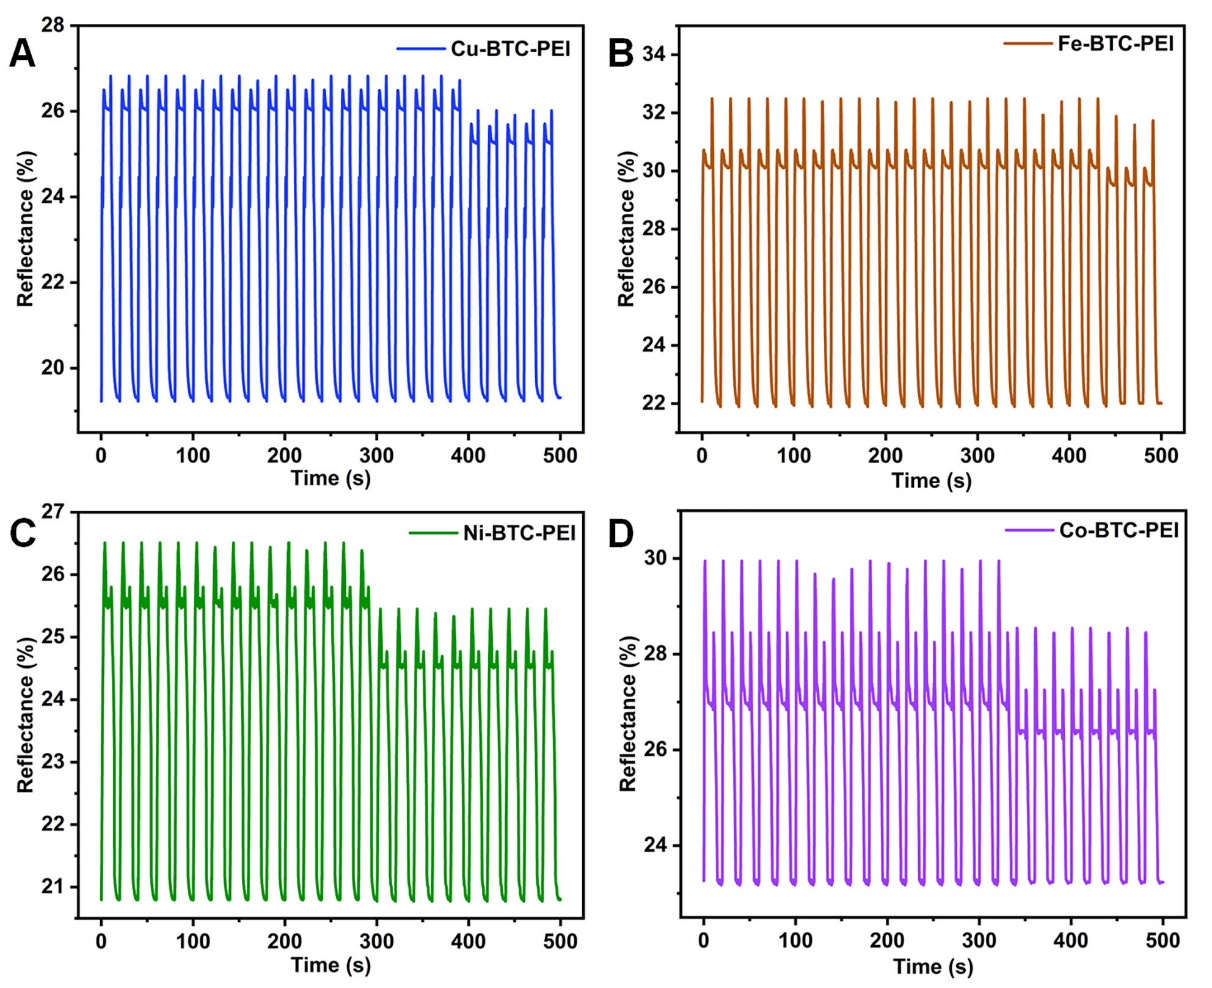


Figure S10. Cycling stabilities of the resulting Cu-BTC-PEI (A), Fe-BTC-PEI (B), Ni-BTC-PEI (C), and Co-BTC-PEI microparticles (D) in the PIBSA-contained isododecane solution inside the predetermined electrophoresis tank with the settled spacing of 100 μm at a driving DC voltage of ±20 V.

Table S1. Zeta potentials and DLS results of the crude and modified white TiO2 nanoparticles.

| Particle | Zeta potential  (mV) | Mobility  (*10-8 m2/(V·s)) | Diameter  (nm) | Polydispersity |
| --- | --- | --- | --- | --- |
| Crude TiO2 | 25.06±2.39 | 0.0183±0.0017 | 201.57±1.05 | 0.080±0.036 |
| Modified TiO2 | 60.83±5.15 | 0.0446±0.0037 | 214.41±3.05 | 0.156±0.052 |

Video S1. Two-color electrophoresis display video of the modified white TiO2 nanoparticles and the reinforced Cu-BTC-PEI microparticles packaged in the predetermined electrophoresis tank with the settled spacing of 100 μm at a driving DC voltage of ±20 V (see the attached video file named “Video S1”).

Video S2. Two-color electrophoresis display video of the modified white TiO2 nanoparticles and the reinforced Fe-BTC-PEI microparticles packaged in the predetermined electrophoresis tank with the settled spacing of 100 μm at a driving DC voltage of ±20 V (see the attached video file named “Video S2”).

Video S3. Two-color electrophoresis display video of the modified white TiO2 nanoparticles and the reinforced Ni-BTC-PEI microparticles packaged in the predetermined electrophoresis tank with the settled spacing of 100 μm at a driving DC voltage of ±20 V (see the attached video file named “Video S3”).

Video S4. Two-color electrophoresis display video of the modified white TiO2 nanoparticles and the reinforced Co-BTC-PEI microparticles packaged in the predetermined electrophoresis tank with the settled spacing of 100 μm at a driving DC voltage of ±20 V (see the attached video file named “Video S4”).
